# Supplementary material for: Performance of Radiological and Biochemical Biomarkers in Predicting Radio-Symptomatic Knee Osteoarthritis Progression
Source: MDPI journal article supplement (doi:10.3390/biomedicines12030666), 2024-03-16
Supplement: s1 [file s1]

**Abbreviations:** BACC: Balanced accuracy; BIO: Biochemical (urinary C-terminal cross-linked telopeptides of type II collagen, crosslinked N-telopeptide of type I collagen serum, and Hyaluronic Acid serum) parameters; CLIN: clinical (age, sex, body mass index) covariates; JSNM: Joint space narrowing score in the medial tibial plateau; KL: Kellgren-Lawrence score; NPV: Negative predictive value; PPV: Positive predictive value; TBT: Trabecular bone texture; TBTC: Trabecular bone texture parameters extracted from the central compartment; TBTL: Trabecular bone texture parameters extracted from the lateral compartment; TBTM: Trabecular bone texture parameters extracted from the medial compartment.

**Table S1:** Primary analysis: Prediction of radio-symptomatic progression using TBT descriptors adjusted for a set of clinical, radiographic and/or biochemical parameters.

| Model                                           | BACC        | PPV         | NPV         | AUC (95%CI)                  | p-value |
|-------------------------------------------------|-------------|-------------|-------------|------------------------------|---------|
| TBT $\leftarrow$ CLIN+KL+JSNM*                  | 0.55        | 0.50        | 0.70        | 0.613 (0.565 - 0.662)        | -       |
| $\Delta$ TBT $\leftarrow$ CLIN+KL+JSNM          | 0.53        | 0.45        | 0.70        | 0.606 (0.558 - 0.653)        | 0.777   |
| TBT+ $\Delta$ TBT $\leftarrow$ CLIN+KL+JSNM     | <b>0.59</b> | 0.52        | <b>0.73</b> | 0.650 (0.603 - 0.697)        | 0.044   |
| TBT                                             | 0.55        | 0.53        | 0.70        | 0.609 (0.561 - 0.657)        | 0.697   |
| TBT $\leftarrow$ BIO                            | 0.55        | 0.50        | 0.70        | 0.617 (0.569 - 0.665)        | 0.630   |
| TBT $\leftarrow$ BIO+CLIN                       | 0.55        | 0.49        | 0.70        | 0.609 (0.561 - 0.658)        | 0.574   |
| TBT $\leftarrow$ BIO+KL                         | 0.55        | 0.51        | 0.70        | 0.615 (0.566 - 0.663)        | 0.859   |
| TBT $\leftarrow$ BIO+JSNM                       | 0.56        | 0.52        | 0.71        | 0.622 (0.574 - 0.671)        | 0.022   |
| TBT $\leftarrow$ BIO+CLIN+KL                    | 0.55        | 0.49        | 0.70        | 0.607 (0.558 - 0.656)        | 0.856   |
| TBT $\leftarrow$ BIO+CLIN+JSNM                  | 0.55        | 0.50        | 0.71        | 0.614 (0.566 - 0.663)        | 0.320   |
| TBT $\leftarrow$ BIO+CLIN+KL+JSNM               | 0.55        | 0.49        | 0.70        | 0.613 (0.565 - 0.661)        | 0.287   |
| $\Delta$ TBT                                    | 0.52        | 0.40        | 0.69        | 0.610 (0.562 - 0.658)        | 0.921   |
| TBT+ $\Delta$ TBT                               | 0.58        | 0.51        | 0.72        | <b>0.658</b> (0.612 - 0.705) | 0.030   |
| TBT+ $\Delta$ TBT $\leftarrow$ BIO              | <b>0.59</b> | 0.52        | <b>0.73</b> | <b>0.658</b> (0.611 - 0.704) | 0.022   |
| TBT+ $\Delta$ TBT $\leftarrow$ CLIN             | 0.58        | 0.51        | 0.72        | 0.656 (0.609 - 0.702)        | 0.038   |
| TBT+ $\Delta$ TBT $\leftarrow$ KL               | 0.58        | 0.51        | 0.72        | <b>0.658</b> (0.611 - 0.704) | 0.029   |
| TBT+ $\Delta$ TBT $\leftarrow$ JSNM             | 0.58        | 0.51        | 0.72        | <b>0.658</b> (0.612 - 0.705) | 0.024   |
| TBT+ $\Delta$ TBT $\leftarrow$ BIO+CLIN         | <b>0.59</b> | 0.52        | 0.73        | 0.653 (0.607 - 0.700)        | 0.036   |
| TBT+ $\Delta$ TBT $\leftarrow$ BIO+KL           | <b>0.59</b> | 0.52        | 0.72        | 0.656 (0.609 - 0.702)        | 0.026   |
| TBT+ $\Delta$ TBT $\leftarrow$ BIO+JSNM         | <b>0.59</b> | 0.52        | <b>0.73</b> | 0.656 (0.609 - 0.702)        | 0.021   |
| TBT+ $\Delta$ TBT $\leftarrow$ BIO+CLIN+ KL     | <b>0.59</b> | 0.52        | <b>0.73</b> | 0.653 (0.606 - 0.699)        | 0.036   |
| TBT+ $\Delta$ TBT $\leftarrow$ BIO+CLIN+JSNM    | <b>0.59</b> | 0.52        | <b>0.73</b> | 0.652 (0.605 - 0.699)        | 0.039   |
| TBT+ $\Delta$ TBT $\leftarrow$ BIO+CLIN+KL+JSNM | <b>0.59</b> | 0.52        | <b>0.73</b> | 0.649 (0.601 - 0.696)        | 0.054   |
| TBTM $\leftarrow$ CLIN+KL+JSNM                  | 0.51        | 0.42        | 0.68        | 0.571 (0.522 - 0.620)        | 0.062   |
| $\Delta$ TBTM $\leftarrow$ CLIN+KL+JSNM         | 0.51        | <b>0.54</b> | 0.68        | 0.563 (0.513 - 0.612)        | 0.075   |
| TBTM+ $\Delta$ TBTM $\leftarrow$ CLIN+KL+JSNM   | 0.53        | 0.52        | 0.69        | 0.594 (0.545 - 0.643)        | 0.456   |
| TBTL $\leftarrow$ CLIN+KL+JSNM                  | 0.50        | 0.22        | 0.68        | 0.562 (0.514 - 0.610)        | 0.029   |
| $\Delta$ TBTL $\leftarrow$ CLIN+KL+JSNM         | 0.50        | 0.38        | 0.68        | 0.555 (0.505 - 0.605)        | 0.026   |
| TBTL+ $\Delta$ TBTL $\leftarrow$ CLIN+KL+JSNM   | 0.51        | 0.46        | 0.68        | 0.577 (0.527 - 0.627)        | 0.173   |
| TBTC $\leftarrow$ CLIN+KL+JSNM                  | 0.50        | NaN         | 0.68        | 0.511 (0.461 - 0.560)        | 0.000   |
| $\Delta$ TBTC $\leftarrow$ CLIN+KL+JSNM         | 0.51        | 0.47        | 0.68        | 0.572 (0.525 - 0.620)        | 0.134   |
| TBTC+ $\Delta$ TBTC $\leftarrow$ CLIN+KL+JSNM   | 0.51        | 0.46        | 0.68        | 0.572 (0.524 - 0.620)        | 0.131   |

\* refers to the reference model. The model with the descriptor on the left of ( $\leftarrow$ ) is adjusted for the descriptor(s) on the right of ( $\leftarrow$ ). The highest BACC, PPV, NPV and AUC values obtained are in bold.

**Table S2:** Secondary analysis: Prediction of any progression using TBT descriptors adjusted for a set of clinical, radiographic and/or biochemical parameters.

| Model                                           | BACC        | PPV         | NPV         | AUC (95%CI)                  | p-value |
|-------------------------------------------------|-------------|-------------|-------------|------------------------------|---------|
| TBT $\leftarrow$ CLIN+KL+JSNM*                  | 0.55        | 0.69        | 0.46        | 0.628 (0.582 - 0.675)        | -       |
| $\Delta$ TBT $\leftarrow$ CLIN+KL+JSNM          | 0.56        | 0.70        | 0.51        | 0.638 (0.592 - 0.685)        | 0.697   |
| TBT+ $\Delta$ TBT $\leftarrow$ CLIN+KL+JSNM     | <b>0.60</b> | <b>0.72</b> | 0.52        | <b>0.679</b> (0.634 - 0.724) | 0.009   |
| TBT                                             | 0.53        | 0.68        | 0.44        | 0.615 (0.568 - 0.662)        | 0.377   |
| TBT $\leftarrow$ BIO                            | 0.54        | 0.69        | 0.48        | 0.624 (0.577 - 0.671)        | 0.734   |
| TBT $\leftarrow$ BIO+CLIN                       | 0.54        | 0.69        | 0.48        | 0.617 (0.569 - 0.665)        | 0.303   |
| TBT $\leftarrow$ BIO+KL                         | 0.54        | 0.69        | 0.48        | 0.620 (0.573 - 0.667)        | 0.505   |
| TBT $\leftarrow$ BIO+JSNM                       | 0.54        | 0.68        | 0.46        | 0.626 (0.580 - 0.673)        | 0.904   |
| TBT $\leftarrow$ BIO+CLIN+KL                    | 0.54        | 0.69        | 0.47        | 0.614 (0.566 - 0.661)        | 0.437   |
| TBT $\leftarrow$ BIO+CLIN+JSNM                  | 0.55        | 0.69        | 0.48        | 0.622 (0.575 - 0.669)        | 0.173   |
| TBT $\leftarrow$ BIO+CLIN+KL+JSNM               | 0.55        | 0.69        | 0.46        | 0.629 (0.582 - 0.675)        | 0.025   |
| $\Delta$ TBT                                    | 0.56        | 0.69        | 0.56        | 0.615 (0.568 - 0.662)        | 0.680   |
| TBT+ $\Delta$ TBT                               | 0.58        | 0.71        | 0.52        | 0.672 (0.627 - 0.717)        | 0.075   |
| TBT+ $\Delta$ TBT $\leftarrow$ BIO              | 0.59        | <b>0.72</b> | <b>0.53</b> | 0.676 (0.631 - 0.721)        | 0.033   |
| TBT+ $\Delta$ TBT $\leftarrow$ CLIN             | 0.59        | <b>0.72</b> | 0.52        | 0.672 (0.627 - 0.717)        | 0.062   |
| TBT+ $\Delta$ TBT $\leftarrow$ KL               | 0.58        | 0.71        | 0.52        | 0.669 (0.624 - 0.714)        | 0.100   |
| TBT+ $\Delta$ TBT $\leftarrow$ JSNM             | 0.58        | 0.71        | 0.52        | 0.675 (0.630 - 0.720)        | 0.051   |
| TBT+ $\Delta$ TBT $\leftarrow$ BIO+CLIN         | 0.59        | <b>0.72</b> | 0.52        | 0.674 (0.629 - 0.719)        | 0.030   |
| TBT+ $\Delta$ TBT $\leftarrow$ BIO+KL           | 0.59        | 0.71        | 0.52        | 0.673 (0.628 - 0.718)        | 0.046   |
| TBT+ $\Delta$ TBT $\leftarrow$ BIO+JSNM         | 0.59        | <b>0.72</b> | <b>0.53</b> | 0.676 (0.631 - 0.721)        | 0.026   |
| TBT+ $\Delta$ TBT $\leftarrow$ BIO+CLIN+ KL     | 0.59        | <b>0.72</b> | 0.52        | 0.671 (0.626 - 0.716)        | 0.023   |
| TBT+ $\Delta$ TBT $\leftarrow$ BIO+CLIN+JSNM    | 0.59        | <b>0.72</b> | 0.52        | 0.675 (0.630 - 0.720)        | 0.045   |
| TBT+ $\Delta$ TBT $\leftarrow$ BIO+CLIN+KL+JSNM | <b>0.60</b> | <b>0.72</b> | 0.52        | 0.678 (0.633 - 0.723)        | 0.011   |
| TBTM $\leftarrow$ CLIN+KL+JSNM                  | 0.51        | 0.67        | 0.40        | 0.589 (0.542 - 0.637)        | 0.057   |
| $\Delta$ TBTM $\leftarrow$ CLIN+KL+JSNM         | 0.51        | 0.67        | 0.50        | 0.567 (0.518 - 0.616)        | 0.025   |
| TBTM+ $\Delta$ TBTM $\leftarrow$ CLIN+KL+JSNM   | 0.52        | 0.68        | 0.44        | 0.614 (0.567 - 0.661)        | 0.537   |
| TBTL $\leftarrow$ CLIN+KL+JSNM                  | 0.51        | 0.67        | 0.44        | 0.566 (0.518 - 0.615)        | 0.019   |
| $\Delta$ TBTL $\leftarrow$ CLIN+KL+JSNM         | 0.51        | 0.67        | 0.45        | 0.590 (0.542 - 0.639)        | 0.160   |
| TBTL+ $\Delta$ TBTL $\leftarrow$ CLIN+KL+JSNM   | 0.53        | 0.68        | 0.52        | 0.596 (0.547 - 0.645)        | 0.249   |
| TBTC $\leftarrow$ CLIN+KL+JSNM                  | 0.51        | 0.67        | 0.44        | 0.570 (0.522 - 0.619)        | 0.022   |
| $\Delta$ TBTC $\leftarrow$ CLIN+KL+JSNM         | 0.51        | 0.67        | 0.50        | 0.572 (0.522 - 0.622)        | 0.045   |
| TBTC+ $\Delta$ TBTC $\leftarrow$ CLIN+KL+JSNM   | 0.52        | 0.67        | 0.52        | 0.580 (0.531 - 0.629)        | 0.062   |

\* refers to the reference model. The model with the descriptor on the left of ( $\leftarrow$ ) is adjusted for the descriptor(s) on the right of ( $\leftarrow$ ). The highest BACC, PPV, NPV and AUC values obtained are in bold.

**Table S3:** Secondary analysis: Prediction of all progression using TBT descriptors adjusted for a set of clinical, radiographic and/or biochemical parameters.

| Model                                           | BACC        | PPV         | NPV         | AUC (95%CI)                  | p-value |
|-------------------------------------------------|-------------|-------------|-------------|------------------------------|---------|
| TBT $\leftarrow$ CLIN+KL+JSNM*                  | 0.59        | 0.59        | 0.58        | 0.628 (0.574 - 0.682)        | -       |
| $\Delta$ TBT $\leftarrow$ CLIN+KL+JSNM          | 0.58        | 0.58        | 0.57        | 0.628 (0.574 - 0.682)        | 0.996   |
| TBT+ $\Delta$ TBT $\leftarrow$ CLIN+KL+JSNM     | 0.63        | 0.64        | 0.63        | 0.684 (0.632 - 0.736)        | 0.022   |
| TBT                                             | 0.58        | 0.59        | 0.57        | 0.621 (0.566 - 0.675)        | 0.668   |
| TBT $\leftarrow$ BIO                            | 0.59        | 0.60        | 0.58        | 0.632 (0.578 - 0.686)        | 0.690   |
| TBT $\leftarrow$ BIO+CLIN                       | 0.59        | 0.60        | 0.58        | 0.629 (0.575 - 0.684)        | 0.818   |
| TBT $\leftarrow$ BIO+KL                         | 0.59        | 0.59        | 0.58        | 0.629 (0.575 - 0.683)        | 0.877   |
| TBT $\leftarrow$ BIO+JSNM                       | 0.59        | 0.59        | 0.58        | 0.629 (0.575 - 0.683)        | 0.891   |
| TBT $\leftarrow$ BIO+CLIN+KL                    | 0.59        | 0.59        | 0.58        | 0.628 (0.574 - 0.683)        | 0.755   |
| TBT $\leftarrow$ BIO+CLIN+JSNM                  | 0.59        | 0.59        | 0.58        | 0.624 (0.570 - 0.678)        | 0.901   |
| TBT $\leftarrow$ BIO+CLIN+KL+JSNM               | 0.58        | 0.59        | 0.58        | 0.627 (0.574 - 0.681)        | 0.614   |
| $\Delta$ TBT                                    | 0.59        | 0.59        | 0.58        | 0.628 (0.574 - 0.682)        | 0.988   |
| TBT+ $\Delta$ TBT                               | <b>0.64</b> | 0.64        | 0.63        | 0.685 (0.633 - 0.736)        | 0.047   |
| TBT+ $\Delta$ TBT $\leftarrow$ BIO              | <b>0.64</b> | 0.64        | 0.63        | <b>0.691</b> (0.639 - 0.742) | 0.018   |
| TBT+ $\Delta$ TBT $\leftarrow$ CLIN             | 0.63        | 0.63        | 0.62        | 0.678 (0.626 - 0.730)        | 0.066   |
| TBT+ $\Delta$ TBT $\leftarrow$ KL               | 0.63        | 0.64        | 0.63        | 0.680 (0.628 - 0.732)        | 0.068   |
| TBT+ $\Delta$ TBT $\leftarrow$ JSNM             | 0.63        | 0.64        | 0.63        | 0.682 (0.631 - 0.734)        | 0.050   |
| TBT+ $\Delta$ TBT $\leftarrow$ BIO+CLIN         | 0.63        | 0.64        | 0.63        | 0.683 (0.631 - 0.734)        | 0.037   |
| TBT+ $\Delta$ TBT $\leftarrow$ BIO+KL           | 0.63        | 0.64        | 0.63        | 0.688 (0.637 - 0.740)        | 0.025   |
| TBT+ $\Delta$ TBT $\leftarrow$ BIO+JSNM         | <b>0.64</b> | <b>0.65</b> | <b>0.64</b> | 0.688 (0.637 - 0.740)        | 0.022   |
| TBT+ $\Delta$ TBT $\leftarrow$ BIO+CLIN+ KL     | 0.63        | 0.63        | 0.62        | 0.680 (0.628 - 0.732)        | 0.042   |
| TBT+ $\Delta$ TBT $\leftarrow$ BIO+CLIN+JSNM    | 0.63        | 0.64        | 0.63        | 0.681 (0.629 - 0.733)        | 0.046   |
| TBT+ $\Delta$ TBT $\leftarrow$ BIO+CLIN+KL+JSNM | 0.63        | 0.64        | 0.62        | 0.684 (0.632 - 0.735)        | 0.023   |
| TBTM $\leftarrow$ CLIN+KL+JSNM                  | 0.53        | 0.53        | 0.52        | 0.553 (0.497 - 0.609)        | 0.007   |
| $\Delta$ TBTM $\leftarrow$ CLIN+KL+JSNM         | 0.53        | 0.53        | 0.52        | 0.538 (0.482 - 0.594)        | 0.005   |
| TBTM+ $\Delta$ TBTM $\leftarrow$ CLIN+KL+JSNM   | 0.53        | 0.53        | 0.52        | 0.570 (0.514 - 0.625)        | 0.062   |
| TBTL $\leftarrow$ CLIN+KL+JSNM                  | 0.55        | 0.55        | 0.55        | 0.566 (0.510 - 0.622)        | 0.035   |
| $\Delta$ TBTL $\leftarrow$ CLIN+KL+JSNM         | 0.55        | 0.55        | 0.54        | 0.570 (0.514 - 0.626)        | 0.060   |
| TBTL+ $\Delta$ TBTL $\leftarrow$ CLIN+KL+JSNM   | 0.55        | 0.55        | 0.55        | 0.588 (0.533 - 0.644)        | 0.191   |
| TBTC $\leftarrow$ CLIN+KL+JSNM                  | 0.53        | 0.54        | 0.53        | 0.559 (0.504 - 0.615)        | 0.028   |
| $\Delta$ TBTC $\leftarrow$ CLIN+KL+JSNM         | 0.55        | 0.56        | 0.55        | 0.574 (0.518 - 0.630)        | 0.102   |
| TBTC+ $\Delta$ TBTC $\leftarrow$ CLIN+KL+JSNM   | 0.55        | 0.55        | 0.54        | 0.572 (0.517 - 0.628)        | 0.083   |

\* refers to the reference model. The model with the descriptor on the left of ( $\leftarrow$ ) is adjusted for the descriptor(s) on the right of ( $\leftarrow$ ). The highest BACC, PPV, NPV and AUC values obtained are in bold.

**Table S4:** Secondary analysis: Prediction of radiographic progression using TBT descriptors adjusted for a set of clinical, radiographic and/or biochemical parameters.

| Model                                           | BACC        | PPV         | NPV         | AUC (95%CI)                  | p-value |
|-------------------------------------------------|-------------|-------------|-------------|------------------------------|---------|
| TBT $\leftarrow$ CLIN+KL+JSNM*                  | 0.57        | 0.45        | 0.78        | 0.709 (0.653 - 0.765)        | -       |
| $\Delta$ TBT $\leftarrow$ CLIN+KL+JSNM          | 0.60        | 0.50        | 0.79        | 0.742 (0.688 - 0.795)        | 0.332   |
| TBT+ $\Delta$ TBT $\leftarrow$ CLIN+KL+JSNM     | 0.65        | 0.51        | <b>0.82</b> | 0.779 (0.731 - 0.827)        | 0.012   |
| TBT                                             | 0.56        | 0.50        | 0.77        | 0.652 (0.591 - 0.713)        | 0.005   |
| TBT $\leftarrow$ BIO                            | 0.55        | 0.44        | 0.77        | 0.650 (0.590 - 0.711)        | 0.003   |
| TBT $\leftarrow$ BIO+CLIN                       | 0.57        | 0.46        | 0.78        | 0.699 (0.641 - 0.757)        | 0.319   |
| TBT $\leftarrow$ BIO+KL                         | 0.55        | 0.45        | 0.77        | 0.644 (0.583 - 0.705)        | 0.001   |
| TBT $\leftarrow$ BIO+JSNM                       | 0.56        | 0.46        | 0.77        | 0.664 (0.605 - 0.723)        | 0.009   |
| TBT $\leftarrow$ BIO+CLIN+KL                    | 0.57        | 0.46        | 0.78        | 0.694 (0.635 - 0.752)        | 0.352   |
| TBT $\leftarrow$ BIO+CLIN+JSNM                  | 0.58        | 0.47        | 0.78        | 0.702 (0.645 - 0.759)        | 0.136   |
| TBT $\leftarrow$ BIO+CLIN+KL+JSNM               | 0.57        | 0.45        | 0.78        | 0.708 (0.652 - 0.764)        | 0.198   |
| $\Delta$ TBT                                    | 0.56        | 0.52        | 0.77        | 0.671 (0.612 - 0.731)        | 0.374   |
| TBT+ $\Delta$ TBT                               | 0.63        | 0.49        | 0.81        | 0.752 (0.700 - 0.804)        | 0.191   |
| TBT+ $\Delta$ TBT $\leftarrow$ BIO              | 0.63        | 0.49        | 0.81        | 0.759 (0.707 - 0.810)        | 0.131   |
| TBT+ $\Delta$ TBT $\leftarrow$ CLIN             | 0.65        | 0.51        | 0.82        | 0.773 (0.724 - 0.822)        | 0.025   |
| TBT+ $\Delta$ TBT $\leftarrow$ KL               | 0.63        | 0.48        | 0.81        | 0.749 (0.697 - 0.801)        | 0.230   |
| TBT+ $\Delta$ TBT $\leftarrow$ JSNM             | 0.64        | 0.49        | 0.81        | 0.753 (0.702 - 0.805)        | 0.172   |
| TBT+ $\Delta$ TBT $\leftarrow$ BIO+CLIN         | <b>0.66</b> | <b>0.52</b> | <b>0.82</b> | <b>0.783</b> (0.736 - 0.831) | 0.009   |
| TBT+ $\Delta$ TBT $\leftarrow$ BIO+KL           | 0.63        | 0.48        | 0.81        | 0.754 (0.703 - 0.806)        | 0.171   |
| TBT+ $\Delta$ TBT $\leftarrow$ BIO+JSNM         | 0.63        | 0.49        | 0.81        | 0.760 (0.709 - 0.811)        | 0.116   |
| TBT+ $\Delta$ TBT $\leftarrow$ BIO+CLIN+ KL     | 0.65        | 0.51        | <b>0.82</b> | 0.779 (0.731 - 0.828)        | 0.012   |
| TBT+ $\Delta$ TBT $\leftarrow$ BIO+CLIN+JSNM    | 0.65        | 0.51        | <b>0.82</b> | 0.781 (0.733 - 0.829)        | 0.014   |
| TBT+ $\Delta$ TBT $\leftarrow$ BIO+CLIN+KL+JSNM | 0.65        | 0.51        | <b>0.82</b> | 0.779 (0.731 - 0.828)        | 0.011   |
| TBTM $\leftarrow$ CLIN+KL+JSNM                  | 0.52        | 0.39        | 0.76        | 0.654 (0.594 - 0.713)        | 0.038   |
| $\Delta$ TBTM $\leftarrow$ CLIN+KL+JSNM         | 0.53        | 0.44        | 0.76        | 0.678 (0.616 - 0.739)        | 0.368   |
| TBTM+ $\Delta$ TBTM $\leftarrow$ CLIN+KL+JSNM   | 0.56        | 0.52        | 0.77        | 0.683 (0.623 - 0.742)        | 0.423   |
| TBTL $\leftarrow$ CLIN+KL+JSNM                  | 0.52        | 0.43        | 0.76        | 0.653 (0.589 - 0.716)        | 0.022   |
| $\Delta$ TBTL $\leftarrow$ CLIN+KL+JSNM         | 0.53        | 0.42        | 0.76        | 0.678 (0.618 - 0.738)        | 0.325   |
| TBTL+ $\Delta$ TBTL $\leftarrow$ CLIN+KL+JSNM   | 0.55        | 0.50        | 0.77        | 0.676 (0.615 - 0.736)        | 0.256   |
| TBTC $\leftarrow$ CLIN+KL+JSNM                  | 0.51        | 0.35        | 0.75        | 0.652 (0.590 - 0.713)        | 0.032   |
| $\Delta$ TBTC $\leftarrow$ CLIN+KL+JSNM         | 0.52        | 0.46        | 0.75        | 0.647 (0.588 - 0.706)        | 0.041   |
| TBTC+ $\Delta$ TBTC $\leftarrow$ CLIN+KL+JSNM   | 0.52        | 0.38        | 0.76        | 0.653 (0.595 - 0.712)        | 0.034   |

\* refers to the reference model. The model with the descriptor on the left of ( $\leftarrow$ ) is adjusted for the descriptor(s) on the right of ( $\leftarrow$ ). The highest BACC, PPV, NPV and AUC values obtained are in bold.

**Table S5:** Secondary analysis: Prediction of symptomatic progression using TBT descriptors adjusted for a set of clinical, radiographic and/or biochemical parameters.

| Model                                           | BACC        | PPV         | NPV         | AUC (95%CI)                  | p-value |
|-------------------------------------------------|-------------|-------------|-------------|------------------------------|---------|
| TBT $\leftarrow$ CLIN+KL+JSNM*                  | 0.53        | 0.40        | 0.76        | 0.643 (0.583 - 0.703)        | -       |
| $\Delta$ TBT $\leftarrow$ CLIN+KL+JSNM          | 0.53        | 0.39        | 0.76        | 0.661 (0.602 - 0.720)        | 0.615   |
| TBT+ $\Delta$ TBT $\leftarrow$ CLIN+KL+JSNM     | 0.60        | 0.49        | <b>0.79</b> | 0.710 (0.654 - 0.766)        | 0.027   |
| TBT                                             | 0.51        | 0.31        | 0.75        | 0.620 (0.560 - 0.679)        | 0.276   |
| TBT $\leftarrow$ BIO                            | 0.52        | 0.35        | 0.75        | 0.629 (0.568 - 0.690)        | 0.454   |
| TBT $\leftarrow$ BIO+CLIN                       | 0.53        | 0.42        | 0.76        | 0.651 (0.591 - 0.711)        | 0.110   |
| TBT $\leftarrow$ BIO+KL                         | 0.52        | 0.35        | 0.75        | 0.636 (0.576 - 0.696)        | 0.670   |
| TBT $\leftarrow$ BIO+JSNM                       | 0.52        | 0.36        | 0.75        | 0.631 (0.571 - 0.692)        | 0.487   |
| TBT $\leftarrow$ BIO+CLIN+KL                    | 0.53        | 0.41        | 0.76        | 0.649 (0.589 - 0.708)        | 0.475   |
| TBT $\leftarrow$ BIO+CLIN+JSNM                  | 0.53        | 0.42        | 0.76        | 0.646 (0.587 - 0.706)        | 0.030   |
| TBT $\leftarrow$ BIO+CLIN+KL+JSNM               | 0.53        | 0.40        | 0.76        | 0.645 (0.586 - 0.705)        | 0.027   |
| $\Delta$ TBT                                    | 0.51        | 0.33        | 0.75        | 0.626 (0.567 - 0.686)        | 0.701   |
| TBT+ $\Delta$ TBT                               | 0.59        | 0.50        | 0.78        | 0.698 (0.641 - 0.756)        | 0.132   |
| TBT+ $\Delta$ TBT $\leftarrow$ BIO              | 0.60        | 0.52        | <b>0.79</b> | 0.699 (0.641 - 0.758)        | 0.106   |
| TBT+ $\Delta$ TBT $\leftarrow$ CLIN             | 0.59        | 0.49        | <b>0.79</b> | 0.711 (0.655 - 0.766)        | 0.044   |
| TBT+ $\Delta$ TBT $\leftarrow$ KL               | 0.59        | 0.49        | 0.78        | 0.696 (0.638 - 0.754)        | 0.144   |
| TBT+ $\Delta$ TBT $\leftarrow$ JSNM             | 0.59        | 0.49        | 0.78        | 0.697 (0.639 - 0.754)        | 0.142   |
| TBT+ $\Delta$ TBT $\leftarrow$ BIO+CLIN         | <b>0.61</b> | <b>0.51</b> | <b>0.79</b> | <b>0.718</b> (0.662 - 0.774) | 0.013   |
| TBT+ $\Delta$ TBT $\leftarrow$ BIO+KL           | 0.60        | <b>0.51</b> | <b>0.79</b> | 0.700 (0.642 - 0.758)        | 0.094   |
| TBT+ $\Delta$ TBT $\leftarrow$ BIO+JSNM         | 0.59        | 0.50        | <b>0.79</b> | 0.700 (0.642 - 0.758)        | 0.095   |
| TBT+ $\Delta$ TBT $\leftarrow$ BIO+CLIN+ KL     | 0.60        | 0.50        | <b>0.79</b> | 0.713 (0.657 - 0.769)        | 0.016   |
| TBT+ $\Delta$ TBT $\leftarrow$ BIO+CLIN+JSNM    | 0.60        | 0.50        | <b>0.79</b> | 0.715 (0.660 - 0.771)        | 0.019   |
| TBT+ $\Delta$ TBT $\leftarrow$ BIO+CLIN+KL+JSNM | 0.60        | 0.49        | <b>0.79</b> | 0.710 (0.654 - 0.766)        | 0.027   |
| TBTM $\leftarrow$ CLIN+KL+JSNM                  | 0.50        | 0.07        | 0.75        | 0.566 (0.503 - 0.630)        | 0.018   |
| $\Delta$ TBTM $\leftarrow$ CLIN+KL+JSNM         | 0.50        | 0.13        | 0.74        | 0.601 (0.538 - 0.664)        | 0.230   |
| TBTM+ $\Delta$ TBTM $\leftarrow$ CLIN+KL+JSNM   | 0.50        | 0.31        | 0.75        | 0.618 (0.557 - 0.679)        | 0.463   |
| TBTL $\leftarrow$ CLIN+KL+JSNM                  | 0.51        | 0.37        | 0.75        | 0.594 (0.533 - 0.655)        | 0.088   |
| $\Delta$ TBTL $\leftarrow$ CLIN+KL+JSNM         | 0.50        | 0.01        | 0.74        | 0.584 (0.519 - 0.649)        | 0.096   |
| TBTL+ $\Delta$ TBTL $\leftarrow$ CLIN+KL+JSNM   | 0.50        | 0.27        | 0.75        | 0.618 (0.558 - 0.678)        | 0.427   |
| TBTC $\leftarrow$ CLIN+KL+JSNM                  | 0.51        | 0.54        | 0.75        | 0.570 (0.505 - 0.634)        | 0.006   |
| $\Delta$ TBTC $\leftarrow$ CLIN+KL+JSNM         | 0.50        | 0.22        | 0.75        | 0.571 (0.509 - 0.633)        | 0.041   |
| TBTC+ $\Delta$ TBTC $\leftarrow$ CLIN+KL+JSNM   | 0.52        | 0.49        | 0.75        | 0.588 (0.526 - 0.650)        | 0.055   |

\* refers to the reference model. The model with the descriptor on the left of ( $\leftarrow$ ) is adjusted for the descriptor(s) on the right of ( $\leftarrow$ ). The highest BACC, PPV, NPV and AUC values obtained are in bold.
